# Supplementary material
Source: publisher figshare collection journal article supplement (https://karger.figshare.com/ndownloader/files/13346588)
Supplement: Supplementary file 1 [file 13346588]

## **Supplementary Material**

# **High Glucose-Mediated Cytokine Regulation in Gingival Fibroblasts and THP-1 Macrophage: a Possible Mechanism of Severe Periodontitis with Diabetes**

Jung-Hwan Lew Koji Naruishi Yukari Kajiura Yasufumi Nishikawa  
Takahisa Ikuta Jun-ichi Kido Toshihiko Nagata

Department of Periodontology and Endodontology, Tokushima University Graduate School of Biomedical Sciences,  
Kuramoto, Japan

**Supplemental Table. Comparison of several parameters between groups of periodontitis patients with or without 6 mm over periodontal pocket depth**

| Parameters                     | Deepest PPD    |                | P-value  |
|--------------------------------|----------------|----------------|----------|
|                                | Less than 6 mm | Over than 6 mm |          |
| number of subjects (non-DM/DM) | 35 (22/13)     | 35 (15/20)     |          |
| sex (M/F)                      | 10/25          | 25/10          |          |
| age (yr)                       | 64.4 ± 7.3     | 63.8 ± 8.5     | 0.93     |
| Diabetic conditions            |                |                |          |
| BS (mg/dL)                     | 144.8 ± 57.2   | 177.3 ± 99.2   | 0.21     |
| HbA1c (%)                      | 6.3 ± 1.2      | 6.8 ± 1.2      | 0.046*   |
| Skin AF (AU)                   | 2.2 ± 0.7      | 2.4 ± 0.7      | 0.18     |
| Oral conditions                |                |                |          |
| number of teeth                | 21.6 ± 5.5     | 20.0 ± 5.9     | 0.28     |
| ratio of 4 mm<PPD (%)          | 24.0 ± 28.0    | 57.7 ± 32.3    | <0.0001* |
| ratio of mobile teeth (%)      | 13.1 ± 25.1    | 27.9 ± 28.6    | 0.0049*  |
| ratio of BOP positive (%)      | 31.0 ± 29.6    | 52.0 ± 29.1    | 0.0037*  |
| GCF IL-1β (pg)                 | 27.0 ± 29.4    | 50.8 ± 36.1    | 0.0015*  |
| GCF sIL-6R levels (pg)         | 77.7 ± 42.5    | 107.2 ± 64.3   | 0.042*   |
| GCF CPT levels (ng)            | 182.0 ± 130.0  | 186.2 ± 135.6  | 0.97     |

Data were presented average ± SD. Ranges of age in subjects were 42-74 yr. Levels of both sIL-6R and CPT in gingival crevicular fluid of deepest PPD [Average PPD (mm), group of less than 6mm PPD: 4.4±0.6, group of over than 6mm PPD: 7.0±1.0] were measured using ELISA kit. \*P<0.05 (Mann-Whitney U test). N, number of subjects; DM, diabetes; PPD, periodontal pocket depth; BOP, bleeding on probing; sIL-6R, soluble form of interleukin-6 receptor; CPT, calprotectin; Skin AF, Skin autofluorescence; BS, casual blood sugar; HbA1c, Hemoglobin A1c.
